# Supplementary material
Source: publisher site journal article supplement (https://www.dovepress.com/article/312058)
Supplement: Supplementary file 1 [file get_supplementary_file.php]

**Data Supplement**

Table S1 Odds ratios for new-onset acute kidney injury

| Variables | OR (95% CI) | *p* value |
| --- | --- | --- |
| Plasma SO2 | 1.180 (1.109-1.255) | ＜0.001 |
| Urine NGAL | 1.013 (1.005-1.021) | 0.001 |
| [TIMP-2]·[IGFBP7] | 7.126 (1.349-37.641) | 0.021 |

*OR* odds ratio, *SO2* Sulfur dioxide, *NGAL* neutrophil gelatinase-associated lipocalin, *TIMP-2* tissue inhibitor of metalloproteinases-2, *IGFBP7* insulin-like growth factor-binding protein 7.

Table S2 clinical risk factors for new-onset acute kidney injury

| Variables | Crude OR (95% CI) | Adjusted OR (95% CI) | *p* value |
| --- | --- | --- | --- |
| Hypertension | 2.813 (1.417-5.584) | 3.136 (1.440-6.827) | 0.004 |
| estimated blood loss | 1.001 (1.000-1.002) | 1.001 (1.000-1.002) | 0.005 |
| baseline creatinine | 1.020 (1.003-1.038) | 1.021 (1.003-1.040) | 0.026 |
| SOFA | 1.165 (1.038-1.307) | 1.062 (0.923-1.222) | 0.402 |
| Use of vasopressor | 1.020 (1.003-1.038) | 1.929 (0.919-4.048) | 0.082 |
| Lactate | 1.182 (0.993-1.408) |  |  |

*OR* odds ratio, *SOFA* sequential organ failure assessment.


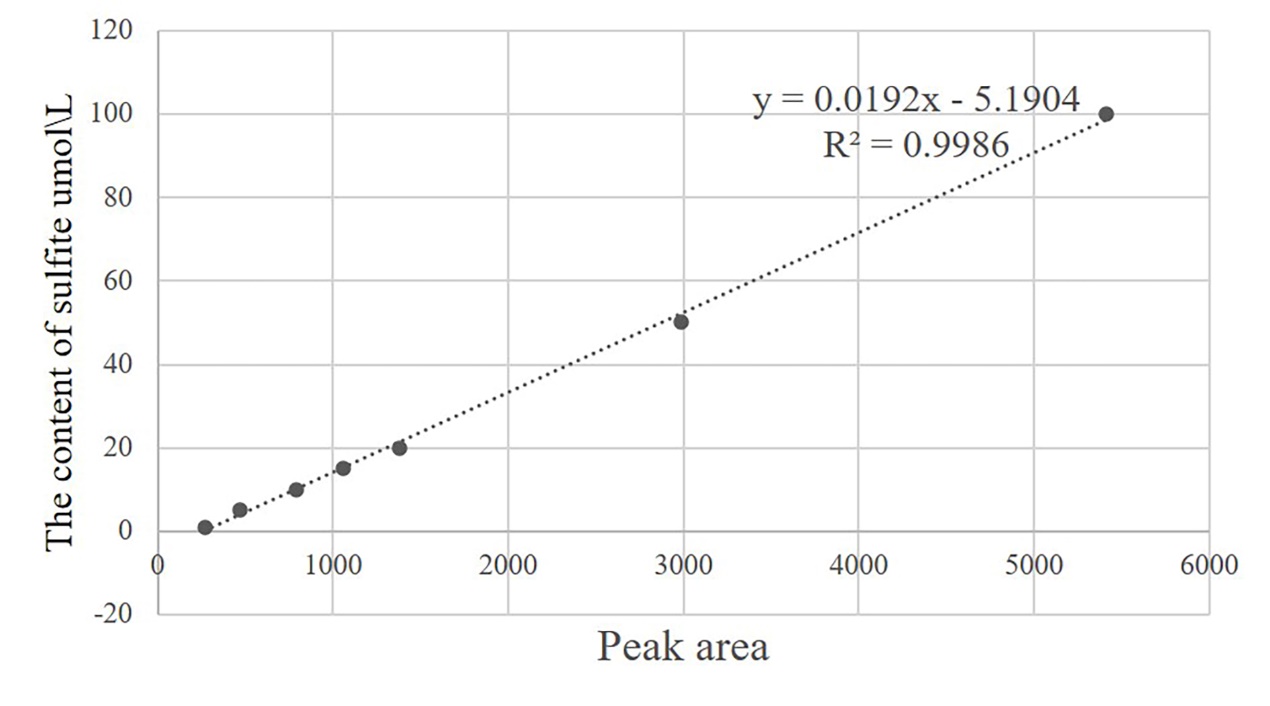
Figure S1 HPLC standard curve of sulfite in standard sample. HPLC, high performance liquid chromatography analysis.
